# Supplementary material
Source: publisher site journal article supplement (https://en-cdn.bio-protocol.org/attached/file/20200615/3673%20Suppl%202%20Figure%20S1%20Example%20Image%20for%20PCCcalc%20DAPI%20Channel%20ch00.docx)
Supplement: Supplementary file 1 [file 3673%20Suppl%202%20Figure%20S1%20Example%20Image%20for%20PCCcalc%20DAPI%20Channel%20ch00.docx]

**Figure S1. Example Image for PCCcalc DAPI Channel ch00**
